# Supplementary material for: Chronic N-Acetylcysteine Treatment Prevents Amphetamine-Induced Hyperactivity in Heterozygous Disc1 Mutant Mice, a Putative Prodromal Schizophrenia Animal Model
Source: MDPI journal article supplement (doi:10.3390/ijms23169419), 2022-08-20
Supplement: s1 [file s1]

**Supplementary Table S1. Antibodies used in this study.**

|                      | Name                                  | Application and Dilution | Catalog number and Company                                   |
|----------------------|---------------------------------------|--------------------------|--------------------------------------------------------------|
| Primary antibodies   | Mouse anti-TH                         | WB; 1:1000               | T1299; Sigma-Aldrich, St. Louis, MO, USA                     |
|                      | Rabbit anti-DAT                       | WB; 1:1000               | ab11146; Abcam, Cambridge, UK                                |
|                      | Mouse anti-D1R                        | WB; 1:200                | sc-33660; Santa Cruz Biotech, Santa Cruz, CA, USA            |
|                      | Mouse anti-D2R                        | WB; 1:200                | sc-5303; Santa Cruz Biotech, Santa Cruz, CA, USA             |
|                      | Rabbit anti-PDE4B                     | WB; 1:1000               | sc-25812; Santa Cruz Biotech, Santa Cruz, CA, USA            |
|                      | Rabbit anti-CREB                      | WB; 1:1000               | Mab 9197; Cell Signaling Danvers, MA, USA                    |
|                      | Rabbit anti-pCREB                     | WB; 1:1000               | Mab 9198; Cell Signaling Danvers, MA, USA                    |
|                      | Mouse anti-GSK3 $\alpha/\beta$        | WB; 1:1000               | sc-7291; Santa Cruz Biotech, Santa Cruz, CA, USA             |
|                      | Rabbit anti-GAPDH                     | WB; 1:5000               | GeneTex, Irvine, CA, USA                                     |
|                      | Mouse anti-PV                         | IHC: 1:1000              | P3088; Sigma-Aldrich, St. Louis, MO, USA                     |
| Secondary antibodies | HRP-conjugated goat anti-mouse IgG    | WB; 1:2000               | The Jackson ImmunoResearch Laboratories, West Grove, PA, USA |
|                      | HRP-conjugated goat anti-rabbit IgG   | WB; 1:2000               | The Jackson ImmunoResearch Laboratories, West Grove, PA, USA |
|                      | Biotin-conjugated goat anti-mouse IgG | IHC; 1:1000              | The Jackson ImmunoResearch Laboratories, West Grove, PA, USA |
|                      |                                       |                          |                                                              |

IHC: Immunohistochemistry; WB: Western blot.
